# Supplementary material for: A Role for Fibrillar Collagen Deposition and the Collagen Internalization Receptor Endo180 in Glioma Invasion
Source: PubMed Central journal article supplement (PMC2842440; doi:10.1371/journal.pone.0009808), 2010-03-22
Supplement: pone.0009808.s002.pdf [file pone.0009808.s002.pdf]

Table S2 (Huijbers et al.)

| <b>Table S2. Clinicopathological details, Endo180 expression and intratumoral collagen deposition in 79 high-grade gliomas</b> |                              |                  |            |                    |                |                               |
|--------------------------------------------------------------------------------------------------------------------------------|------------------------------|------------------|------------|--------------------|----------------|-------------------------------|
| <b>Case no.</b>                                                                                                                | <b>Diagnosis</b>             | <b>WHO grade</b> | <b>Sex</b> | <b>Age (years)</b> | <b>Endo180</b> | <b>Intratumoural Collagen</b> |
| 1                                                                                                                              | Anaplastic oligodendroglioma | III              | Male       | 57                 | Negative       | Negative                      |
| 2                                                                                                                              | Anaplastic oligodendroglioma | III              | Female     | 63                 | Negative       | Negative                      |
| 3                                                                                                                              | Anaplastic oligodendroglioma | III              | Female     | 46                 | Negative       | Negative                      |
| 4                                                                                                                              | Anaplastic oligodendroglioma | III              | Male       | 36                 | Positive       | Negative                      |
| 5                                                                                                                              | Anaplastic oligodendroglioma | III              | Male       | 28                 | Positive       | Negative                      |
| 6                                                                                                                              | Anaplastic astrocytoma       | III              | Male       | 65                 | Positive       | Positive                      |
| 7                                                                                                                              | Anaplastic astrocytoma       | III              | Male       | 38                 | Negative       | Negative                      |
| 8                                                                                                                              | Anaplastic astrocytoma       | III              | Female     | 75                 | Negative       | Negative                      |
| 9                                                                                                                              | Anaplastic astrocytoma       | III              | Female     | 38                 | Negative       | Negative                      |
| 10                                                                                                                             | Anaplastic astrocytoma       | III              | Male       | 52                 | Negative       | Negative                      |
| 11                                                                                                                             | Glioblastoma multiforme      | IV               | Male       | 42                 | Positive       | Negative                      |
| 12                                                                                                                             | Glioblastoma multiforme      | IV               | Male       | 76                 | Positive       | Negative                      |
| 13                                                                                                                             | Glioblastoma multiforme      | IV               | Female     | 63                 | Negative       | Negative                      |
| 14                                                                                                                             | Glioblastoma multiforme      | IV               | Male       | 70                 | Positive       | Negative                      |
| 15                                                                                                                             | Glioblastoma multiforme      | IV               | Female     | 56                 | Positive       | Positive                      |
| 16                                                                                                                             | Glioblastoma multiforme      | IV               | Male       | 50                 | Positive       | Negative                      |
| 17                                                                                                                             | Glioblastoma multiforme      | IV               | Male       | 53                 | Positive       | Positive                      |
| 18                                                                                                                             | Glioblastoma multiforme      | IV               | Female     | 57                 | Positive       | Negative                      |
| 19                                                                                                                             | Glioblastoma multiforme      | IV               | Male       | 76                 | Positive       | Negative                      |
| 20                                                                                                                             | Glioblastoma multiforme      | IV               | Female     | 67                 | Negative       | Negative                      |
| 21                                                                                                                             | Glioblastoma multiforme      | IV               | Male       | 55                 | Positive       | Positive                      |
| 22                                                                                                                             | Glioblastoma multiforme      | IV               | Male       | 42                 | Positive       | Negative                      |
| 23                                                                                                                             | Glioblastoma multiforme      | IV               | Male       | 60                 | Positive       | Positive                      |
| 24                                                                                                                             | Glioblastoma multiforme      | IV               | Male       | 40                 | Positive       | Negative                      |
| 25                                                                                                                             | Glioblastoma multiforme      | IV               | Male       | 47                 | Negative       | Negative                      |
| 26                                                                                                                             | Glioblastoma multiforme      | IV               | Male       | 41                 | Positive       | Positive                      |
| 27                                                                                                                             | Glioblastoma multiforme      | IV               | Female     | 74                 | Positive       | Negative                      |
| 28                                                                                                                             | Glioblastoma multiforme      | IV               | Male       | 70                 | Positive       | Negative                      |
| 29                                                                                                                             | Glioblastoma multiforme      | IV               | Female     | 44                 | Negative       | Negative                      |
| 30                                                                                                                             | Glioblastoma multiforme      | IV               | Female     | 67                 | Positive       | Negative                      |
| 31                                                                                                                             | Glioblastoma multiforme      | IV               | Female     | 61                 | Positive       | Negative                      |
| 32                                                                                                                             | Glioblastoma multiforme      | IV               | Male       | 72                 | Positive       | Negative                      |
| 33                                                                                                                             | Glioblastoma multiforme      | IV               | Female     | 79                 | Positive       | Positive                      |
| 34                                                                                                                             | Glioblastoma multiforme      | IV               | Male       | 56                 | Positive       | Negative                      |
| 35                                                                                                                             | Glioblastoma multiforme      | IV               | Male       | 65                 | Positive       | Positive                      |
| 36                                                                                                                             | Glioblastoma multiforme      | IV               | Male       | 52                 | Positive       | Positive                      |
| 37                                                                                                                             | Glioblastoma multiforme      | IV               | Male       | 51                 | Negative       | Negative                      |
| 38                                                                                                                             | Glioblastoma multiforme      | IV               | Female     | 55                 | Positive       | Negative                      |
| 39                                                                                                                             | Glioblastoma multiforme      | IV               | Male       | 66                 | Negative       | Negative                      |
| 40                                                                                                                             | Glioblastoma multiforme      | IV               | Female     | 53                 | Positive       | Negative                      |
| 41                                                                                                                             | Glioblastoma multiforme      | IV               | Female     | 54                 | Positive       | Negative                      |

Table S2 (Huijbers et al.)

|    |                         |    |        |    |          |          |
|----|-------------------------|----|--------|----|----------|----------|
| 42 | Glioblastoma multiforme | IV | Male   | 61 | Positive | Positive |
| 43 | Glioblastoma multiforme | IV | Male   | 80 | Positive | Negative |
| 44 | Glioblastoma multiforme | IV | Male   | 50 | Positive | Positive |
| 45 | Glioblastoma multiforme | IV | Male   | 39 | Positive | Negative |
| 46 | Glioblastoma multiforme | IV | Male   | 68 | Positive | Negative |
| 47 | Glioblastoma multiforme | IV | Male   | 59 | Positive | Negative |
| 48 | Glioblastoma multiforme | IV | Female | 44 | Positive | Negative |
| 49 | Glioblastoma multiforme | IV | Female | 60 | Positive | Negative |
| 50 | Glioblastoma multiforme | IV | Male   | 63 | Positive | Negative |
| 51 | Glioblastoma multiforme | IV | Male   | 73 | Positive | Negative |
| 52 | Glioblastoma multiforme | IV | Female | 59 | Positive | Negative |
| 53 | Glioblastoma multiforme | IV | Male   | 58 | Positive | Positive |
| 54 | Glioblastoma multiforme | IV | Male   | 47 | Negative | Negative |
| 55 | Glioblastoma multiforme | IV | Male   | 57 | Positive | Negative |
| 56 | Glioblastoma multiforme | IV | Male   | 48 | Positive | Negative |
| 57 | Glioblastoma multiforme | IV | Male   | 75 | Positive | Positive |
| 58 | Glioblastoma multiforme | IV | Male   | 49 | Negative | Negative |
| 59 | Glioblastoma multiforme | IV | Female | 34 | Positive | Negative |
| 60 | Glioblastoma multiforme | IV | Female | 69 | Positive | Positive |
| 61 | Glioblastoma multiforme | IV | Male   | 69 | Positive | Positive |
| 62 | Glioblastoma multiforme | IV | Male   | 69 | Negative | Negative |
| 63 | Glioblastoma multiforme | IV | Female | 53 | Positive | Negative |
| 64 | Glioblastoma multiforme | IV | Female | 66 | Positive | Negative |
| 65 | Glioblastoma multiforme | IV | Male   | 78 | Positive | Negative |
| 66 | Glioblastoma multiforme | IV | Male   | 63 | Positive | Positive |
| 67 | Glioblastoma multiforme | IV | Male   | 63 | Positive | Negative |
| 68 | Glioblastoma multiforme | IV | Male   | 67 | Positive | Negative |
| 69 | Glioblastoma multiforme | IV | Male   | 71 | Positive | Negative |
| 70 | Glioblastoma multiforme | IV | Female | 68 | Positive | Positive |
| 71 | Glioblastoma multiforme | IV | Female | 80 | Positive | Positive |
| 72 | Glioblastoma multiforme | IV | Female | 64 | Positive | Negative |
| 73 | Glioblastoma multiforme | IV | Female | 38 | Negative | Negative |
| 74 | Glioblastoma multiforme | IV | Male   | 66 | Positive | Positive |
| 75 | Glioblastoma multiforme | IV | Female | 68 | Positive | Negative |
| 76 | Glioblastoma multiforme | IV | Female | 68 | Positive | Positive |
| 77 | Glioblastoma multiforme | IV | Female | 63 | Positive | Positive |
| 78 | Glioblastoma multiforme | IV | Male   | 71 | Positive | Negative |
| 79 | Glioblastoma multiforme | IV | Female | 38 | Positive | Positive |

Endo180 immunohistochemical staining and Masson's trichrome staining to detect fibrillar collagens was as described in Figure 5. Statistical data is shown in Table 1.
